# Supplementary material for: Water as a colorful ink: transparent, rewritable photonic coatings based on colloidal crystals embedded in chitosan hydrogel
Source: Royal Society of Chemistry journal article supplement (doi:10.1039/c5tc00217f), 2015-01-01
Supplement: c5tc00217f1.pdf [file c5tc00217f1.pdf]

## Water as a colorful ink: transparent, rewritable photonic coatings based on colloidal crystals embedded in chitosan hydrogel

Xuemin Du,<sup>\*a</sup> Tengyue Li,<sup>a</sup> Lijun Li,<sup>a</sup> Zhicheng Zhang,<sup>b</sup> Tianzhun Wu<sup>\*a</sup>

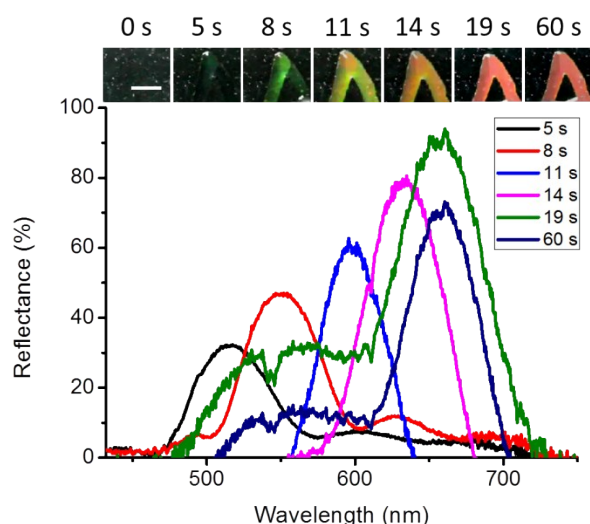

**Fig. S1** The reflection spectra of dynamic writing processes of the photonic coatings with particle size of *ca.* 225 nm. The scale bar is 0.5 mm.

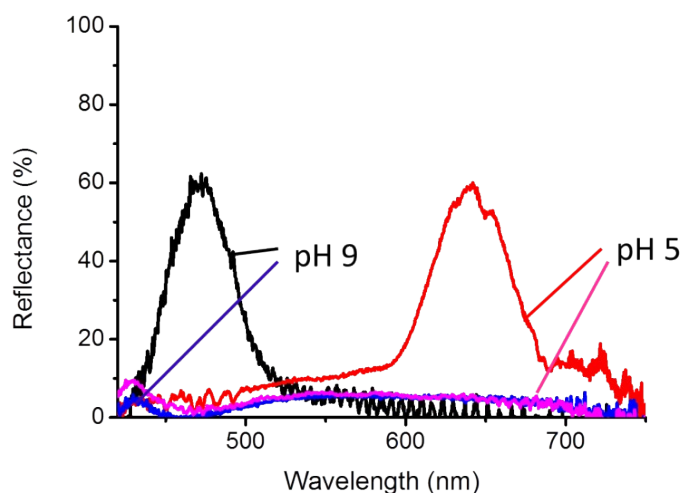

**Fig. S2** The reflection spectra of the photonic coatings with particle size of *ca.* 174 nm after writing with various aqueous buffers of pH 5 (red line), pH 9 (black line), and erasing after water evaporated (purple line and blue line).
